# Supplementary material
Source: PubMed Central journal article supplement (PMC5100757)
Supplement: supp_pp.16.01205_PP2016-01205DR1_Supplemental_Material.pdf [file supp_pp.16.01205_PP2016-01205DR1_Supplemental_Material.pdf]

1 **Supplementary information**

2

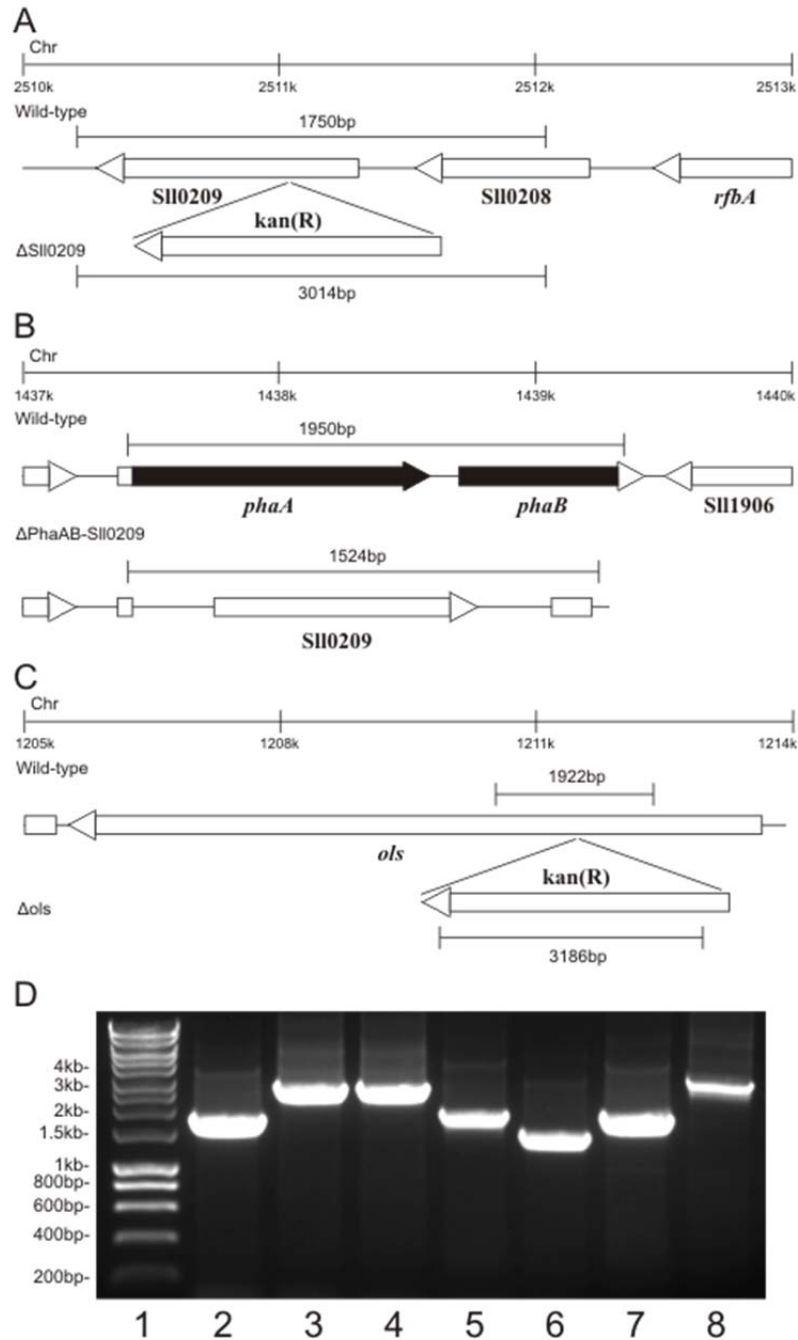

3

4

5 **Figure S1: Generation of mutant strains in *Synechocystis* and *Synechococcus*.** Schematic

6 representations of locus location in the genome (top), and the wild-type and mutant strain

7 (bottom) profiles expected in (A) ΔFAR (ΔSII0209), (B) Complemented (ΔFAR:comp) and (C)

8  $\Delta$ Ols strains following amplification with primers flanking the deleted/inserted sequence.  
9 Regions deleted in  $\Delta$ FAR:comp are shaded in black. (D) Amplification of genomic DNA in  
10 wild-type *Synechocystis* (Lane 2) and  $\Delta$ FAR (Lane 3) and  $\Delta$ FAR:comp (Lane 4) using  
11 Sll0209for/Sll0209rev primers; in wild-type *Synechocystis* (Lane 5) and  $\Delta$ FAR:comp (Lane 6)  
12 using Phafor/Pharev primers; in wild-type *Synechococcus* (Lane 7) and  $\Delta$ Ols (Lane 8) using  
13 Olsfor/Olsrev primers. Markers are in lane 1.

14

15

16

17

18

19

20

21

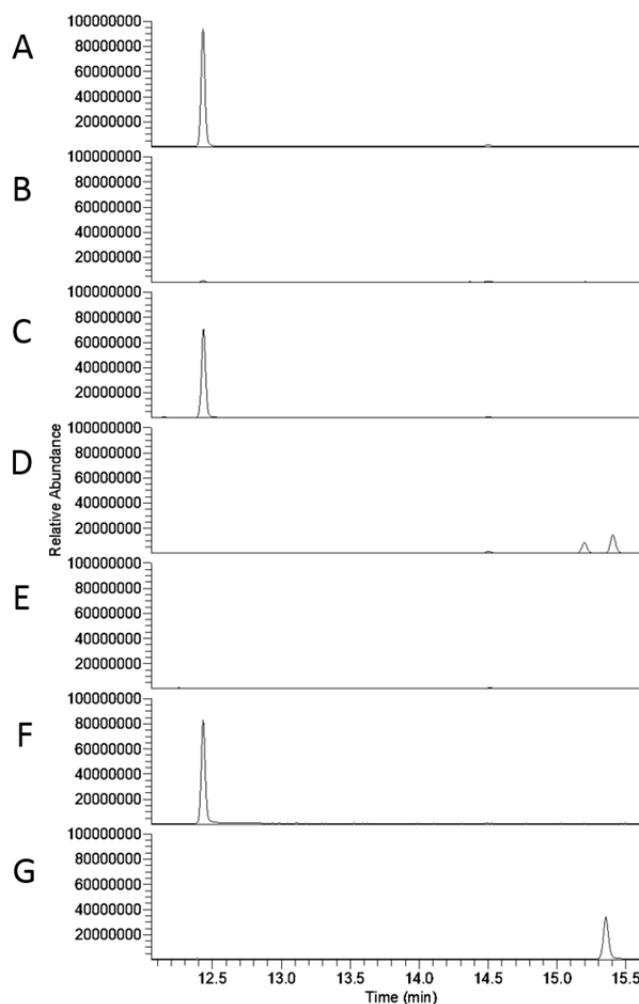

22  
 23  
 24  
 25 **Figure S2: Chromatograms showing separation of hydrocarbons from whole cells.**  
 26 Hydrocarbons were extracted from (A) *Synechocystis* wild-type; (B)  $\Delta$ FAR; (C)  $\Delta$ FAR:comp;  
 27 (D) *Synechococcus* wild-type; (E)  $\Delta$ OIs; (F) heptadecane standard 0.0039 mg/mL; (G)  
 28 nonadecene standard 0.0038 mg/mL by GC-MS (Thermo Scientific Trace GC 1310 – ISQ LT  
 29 Single Quadruple EI MS, A1-1310 Autosampler) using a Thermo TG-SQC GC column (15 m  $\times$   
 30 0.25 mm, 0.25- $\mu$ m film thickness). Peaks were identified as (12.43 min) heptadecane and (15.41  
 31 min) nonadecene. 8-heptadecene was detected at 12.15 min but is not visible due to scaling. The  
 32 peak at 15.2 minutes in (D) *Synechococcus* wild-type was identified (by nist library) as a  
 33 hexadecan-1-ol.

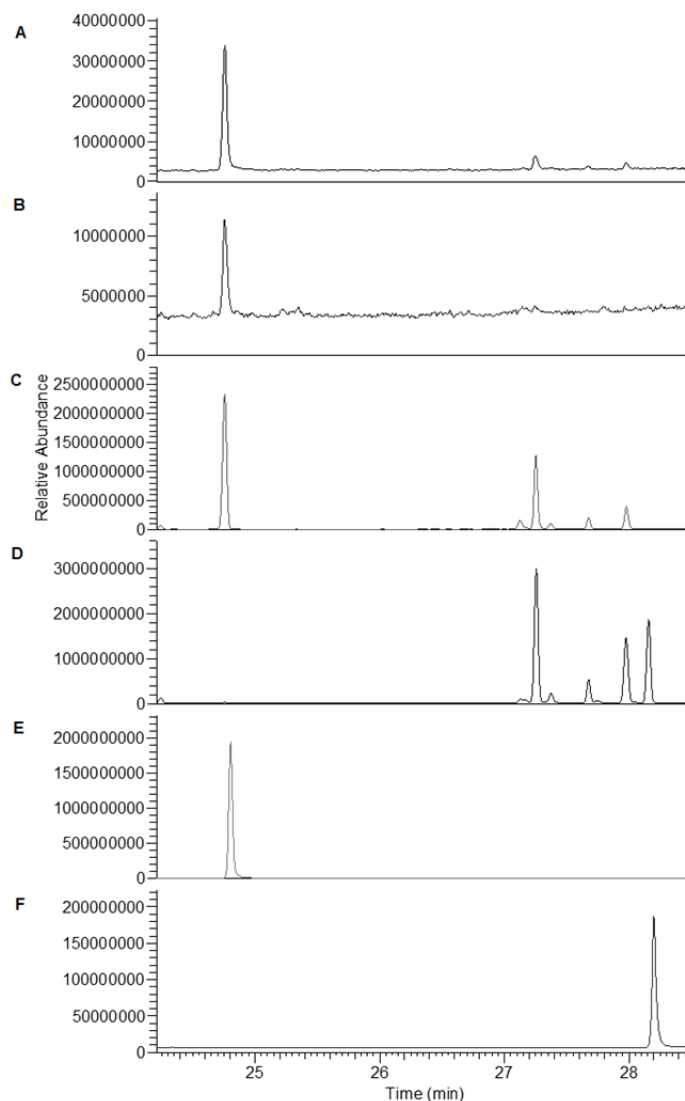

34  
 35  
 36 **Figure S3: Chromatograms showing separation of hydrocarbons from membrane**  
 37 **fractions.** Hydrocarbons were extracted from *Synechocystis* wild-type (A) thylakoid membrane;  
 38 (B) cytoplasmic membrane; (C) total membrane and (D) *Synechococcus* wild-type total  
 39 membrane fractions; (E) heptadecane standard; (F) nonadecene standard GC-MS (Thermo  
 40 Scientific Trace GC 1310 – ISQ LT Single Quadruple EI MS, A1-1310 Autosampler) using a  
 41 Phenomenex Zebron ZB-5MSi Capillary GC Column (30m x 0.25mm x 0.25  $\mu$ m). Peaks were  
 42 identified as (24.76 min) heptadecane and (28.27 min) nonadecene. 8-heptadecene was detected  
 43 at 24.34 min but is not visible due to scaling.

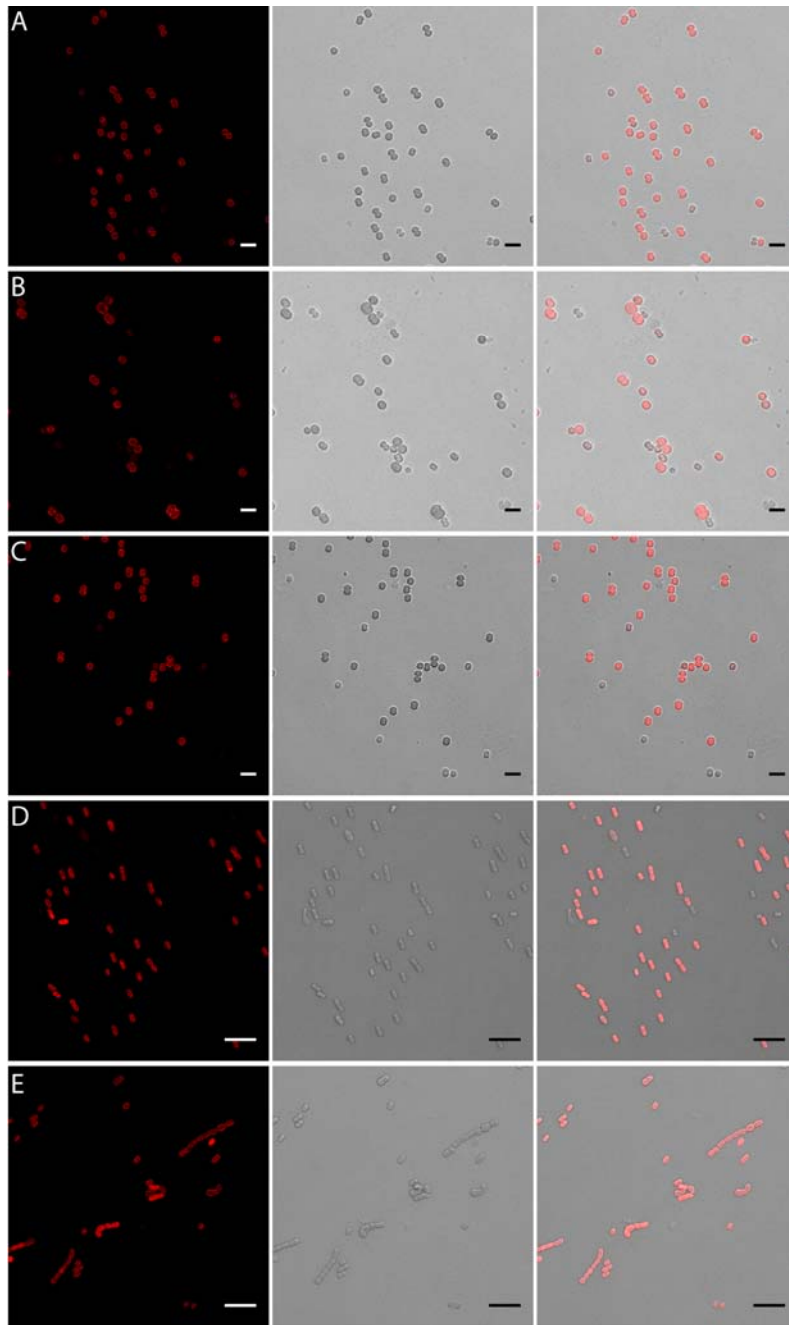

44

45

46 **Figure S4: Brightfield confocal images of *Synechocystis* and *Synechococcus* strains.** Cell

47 morphology of strains used in this study. (A) wild-type *Synechocystis*, (B)  $\Delta$ FAR and (C)

48  $\Delta$ FAR:comp. Scale bars, 5  $\mu$ m. (D) wild-type *Synechococcus* and (E)  $\Delta$ Ols. Scale bars, 10  $\mu$ m.

49 Images show autofluorescence (red, left), bright-field (grey, middle) and an overlay of both

50 (right).

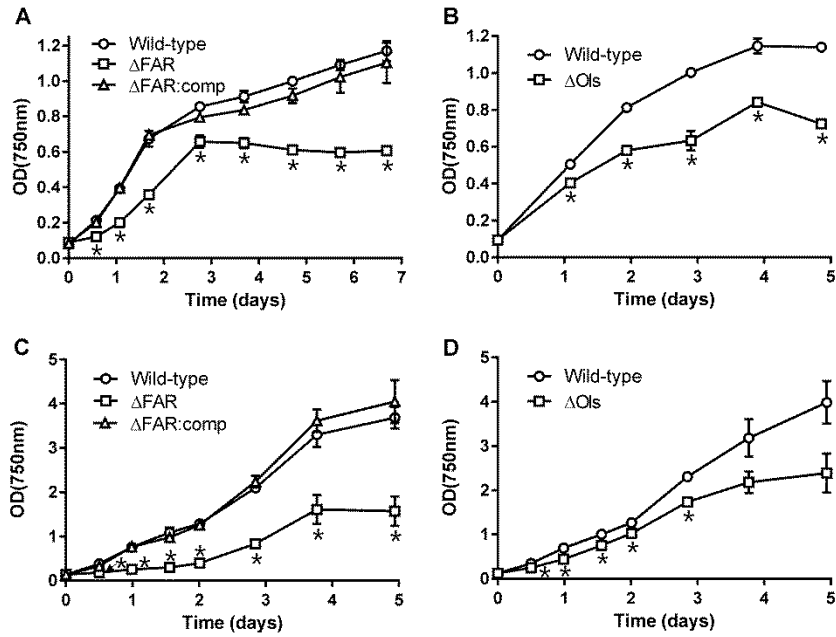

51  
52

53 **Figure S5: Growth of *Synechocystis* and *Synechococcus* under moderate and high light.**

54 Growth of (A, C) *Synechocystis* and (B, D) *Synechococcus* strains was measured at an OD<sub>750nm</sub>

55 under (A, B) moderate (40 μmol photons m<sup>-2</sup> s<sup>-1</sup>) and (C, D) high (120 μmol photons m<sup>-2</sup> s<sup>-1</sup>)

56 light. Cultures were inoculated with a similar amount of cyanobacteria as measured by optical

57 density. Samples grown under high light were bubbled with air. From strains cultured under

58 moderate light the growth rate constants (μ) of wild-type *Synechocystis*, ΔFAR and ΔFAR:comp

59 were 0.015±0.002, 0.007±0.0003 and 0.015±0.001 hr<sup>-1</sup>, respectively, and in wild-type

60 *Synechococcus* and ΔOIs were 0.027±0.001 and 0.019±0.001 hr<sup>-1</sup>, respectively. From strains

61 cultured under high light the growth rate constants (μ) of wild-type *Synechocystis*, ΔFAR and

62 ΔFAR:comp were 0.035±0.005, 0.016±0.005 and 0.038±0.005 hr<sup>-1</sup>, respectively, and in wild-

63 type *Synechococcus* and ΔOIs were 0.034±0.008 and 0.023±0.005 hr<sup>-1</sup>, respectively. Results are

64 from three biological replicates. Errors bars indicate S.D. Asterisks indicate significant

65 differences between wild-type and hydrocarbon deficient samples (Student's paired *t* test: P <

66 0.05).

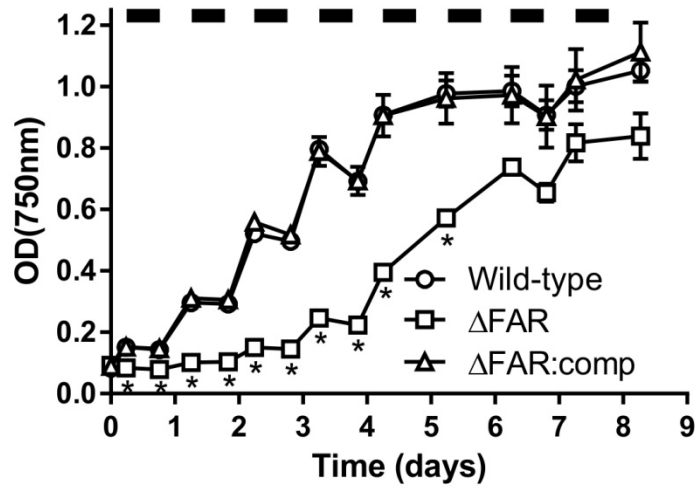

67  
68 **Figure S6: Growth of *Synechocystis* under moderate light/dark cycles.** Growth of  
69 *Synechocystis* was measured at an OD<sub>750nm</sub> under 12 hour light (40 μmol photons m<sup>-2</sup> s<sup>-1</sup>)/12 hour  
70 dark cycles. The growth rate constants (μ) of wild-type *Synechocystis*, ΔFAR and ΔFAR:comp  
71 were 0.011±0.0003, 0.003±0.0001 and 0.011±0.0001 hr<sup>-1</sup>. Dark periods are indicated by black  
72 bars. Results are from three biological replicates. Errors bars indicate S.D. Asterisks indicate  
73 significant differences between wild-type and hydrocarbon deficient samples (Student's paired *t*  
74 test: P < 0.05).

75  
76  
77  
78  
79  
80  
81  
82  
83

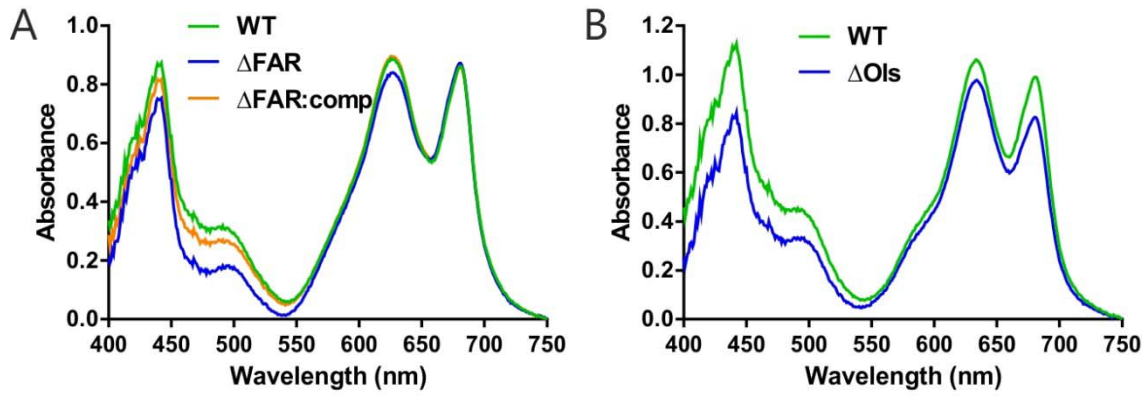

84

85

86 **Figure S7: Absorbance profiles of *Synechocystis* and *Synechococcus* strains.** Spectrum

87 showing the absorbance profile of (A) *Synechocystis* and (B) *Synechococcus* cells. Values are

88 averages from four biological replicates and are standardized to 750 nm.

89

90

91

92

93

94

95

96

97

98

99

100

101

102



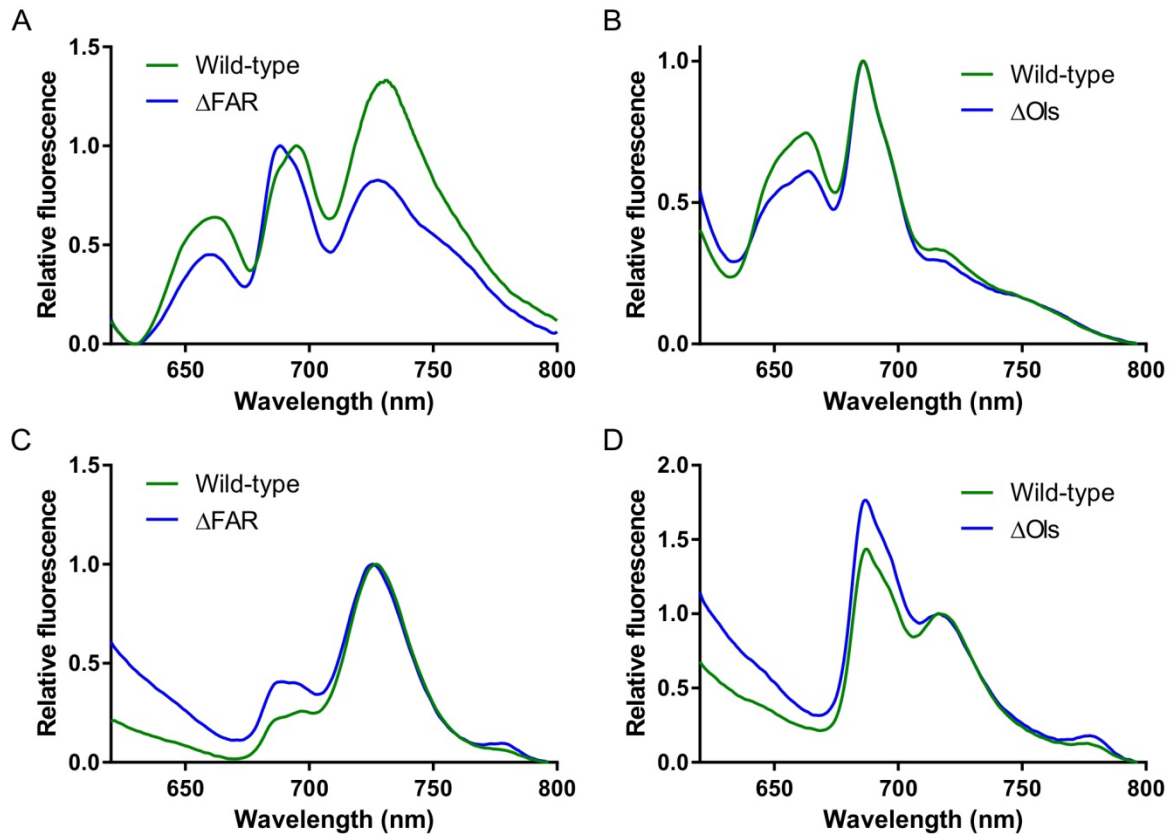

103  
104

105 **Figure S8: 77K fluorescence of *Synechocystis* and *Synechococcus* strains.** The fluorescence  
 106 emission spectra of (A) *Synechocystis* and (B) *Synechococcus* cells were recorded with an  
 107 excitation wavelength at 600 nm at 77K. The spectra were normalized to the highest peak  
 108 between 625 and 710 nm. The fluorescence emission spectra of (C) *Synechocystis* and (D)  
 109 *Synechococcus* cells were recorded with an excitation wavelength at 435 nm at 77K. The spectra  
 110 were normalized to the highest peak between 710 and 750 nm. Results are representative of three  
 111 biological replicates.

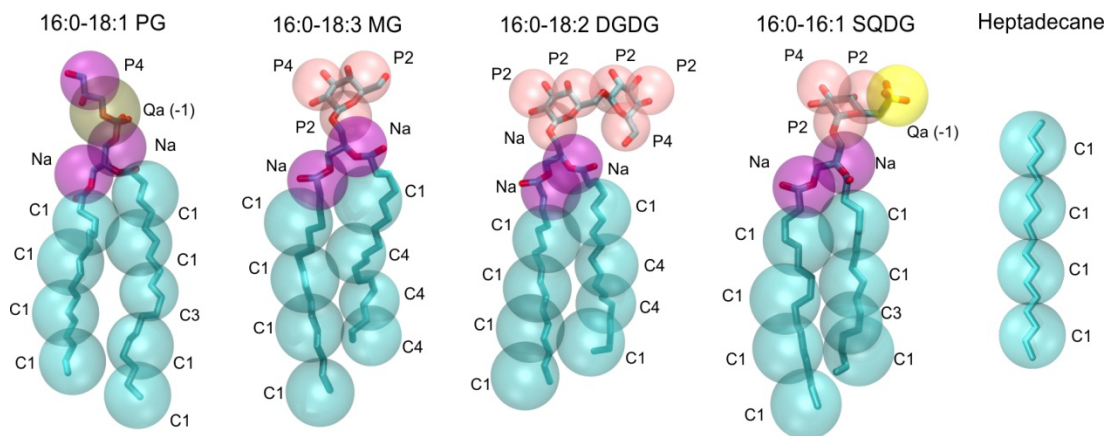

112

113

114 **Figure S9: CG topologies of representative lipids of the membrane.** These are overlaid on  
 115 atomistic topologies of the same lipids. Labels refer to Martini bead type used to describe  
 116 relevant interactions.

117

118

119

120

121

122

123

124

125

126

127

128

129

130

131

132

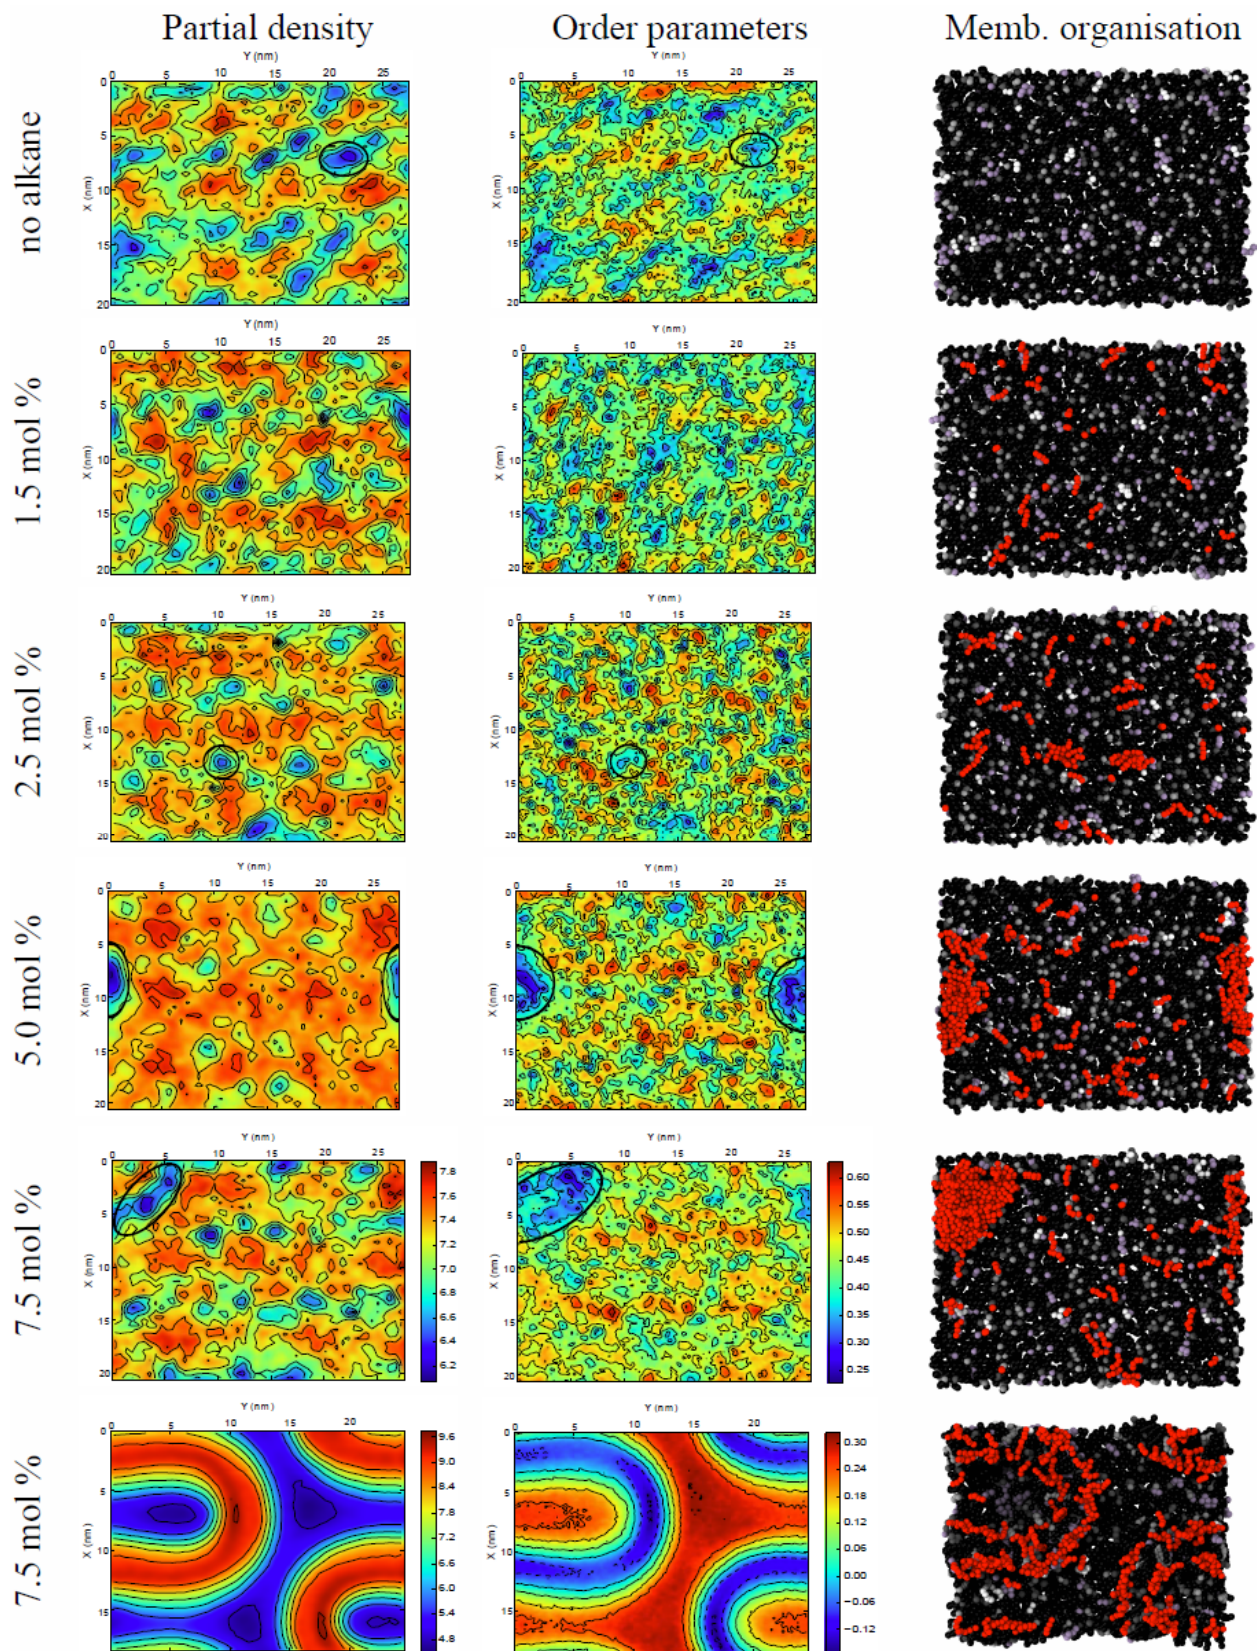

133

134

135 **Figure S10: Membrane partial density (left panels), lipid acyl chain order parameter**  
136 **(central panel), and organization (right panel) in differing hydrocarbon contents averaged**  
137 **over the last 2  $\mu$ s of simulation, seen as a bilayer landscape.** In the 7.5 mol % lamellar system,  
138 these properties are shown for the first 1.2  $\mu$ s of simulation, before phase transition. Regions of  
139 accumulated alkane molecules are highlighted as circles. In membrane snapshots only the tail  
140 beads are visualized, and colored according to degree of saturation. 16:0 tails are black, 16:1  
141 grey, 18:1 white, 18:2 ice blue and 18:3 pale blue. Hydrocarbons are shown in red van der Waals  
142 representation and overlaid on the membranes for clarity.  
143

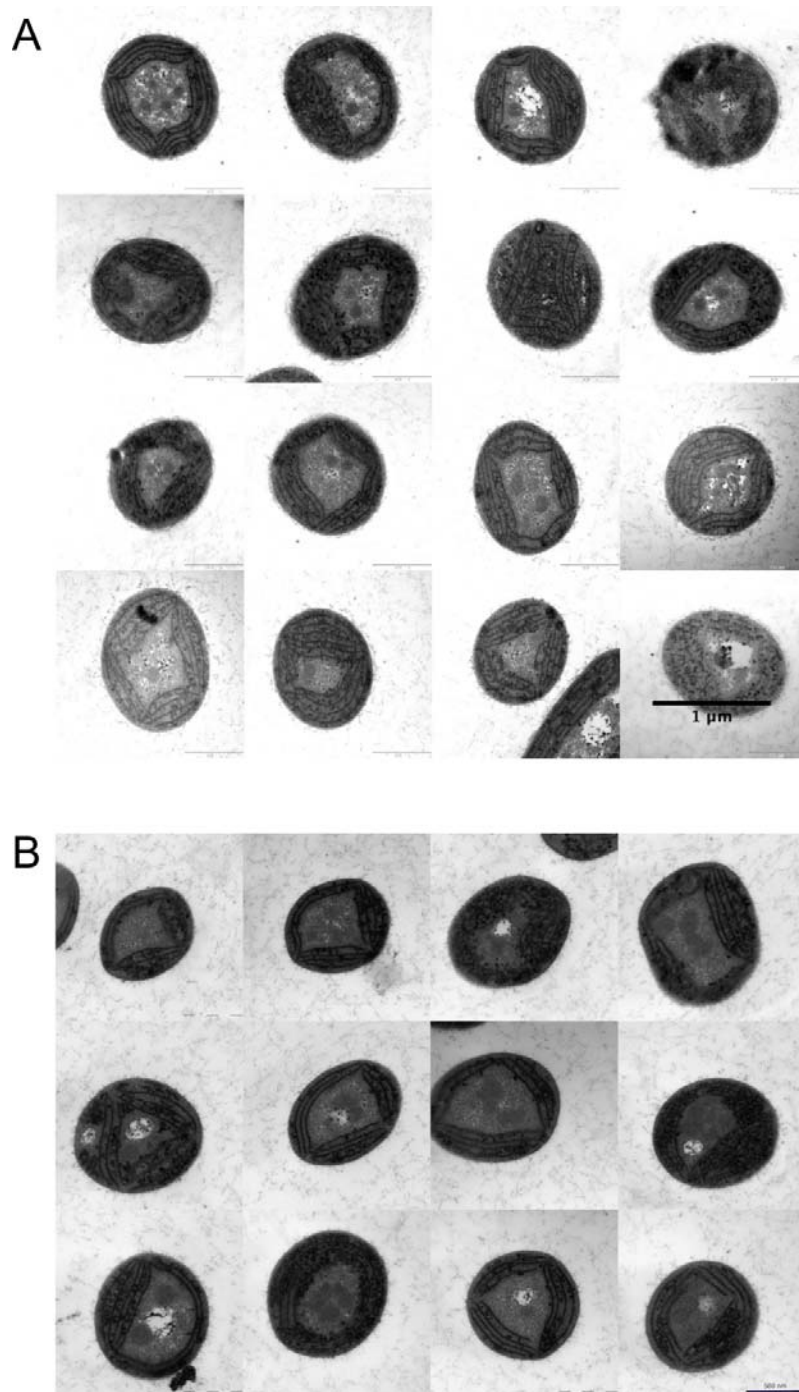

144  
 145  
 146  
 147  
 148  
 149

**Figure S11: Electron microscopy images of *Synechococcus* cells.** Transverse sections of (A) wild-type *Synechococcus* and (B)  $\Delta Ols$  cells used for measuring curvature.

**A Length Ratios of Synechococcus 7002 Wildtype and Ols Knockout Membranes**

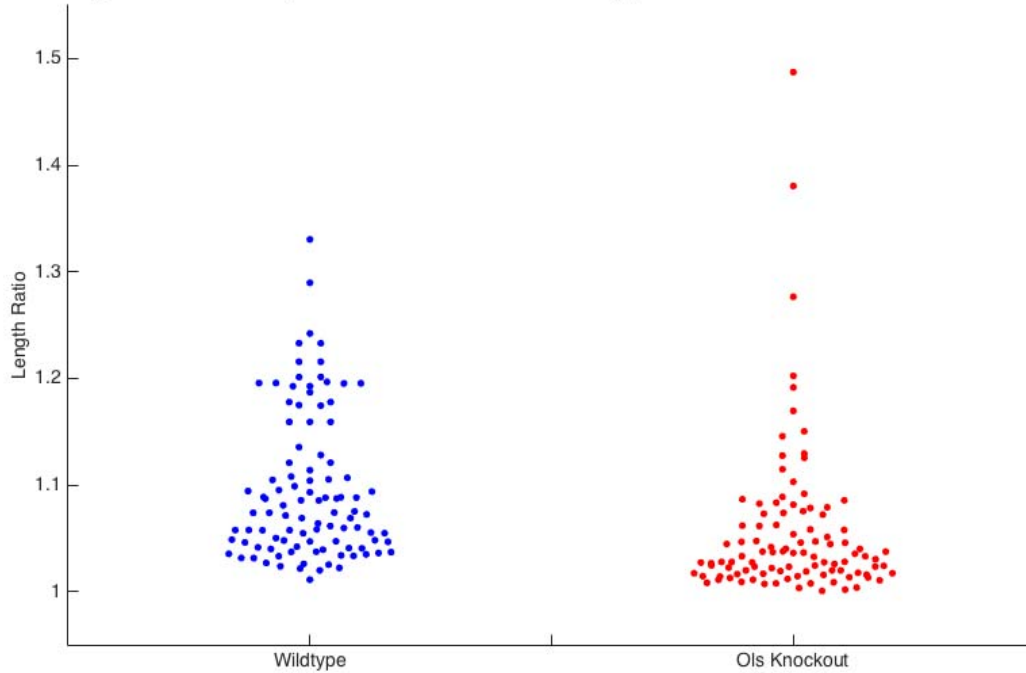

150

**B Probability Density estimation of length ratios for Syn7002 strains**

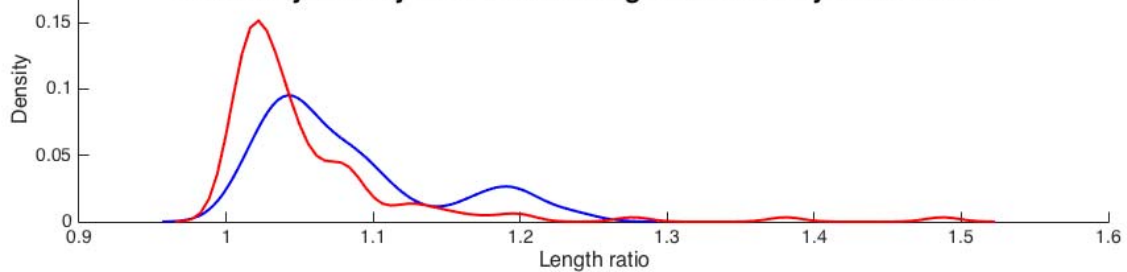

151

152 **Figure S12: Length ratios (curvatures) of membranes from Synechococcus 7002 strains.**

153 (A) Categorical scatter plot of length ratios of all membranes sampled. (B) Kernel Density Plots

154 of Length ratios from wild-type (blue) and  $\Delta$ Ols (red) membranes.

155

156

157

158

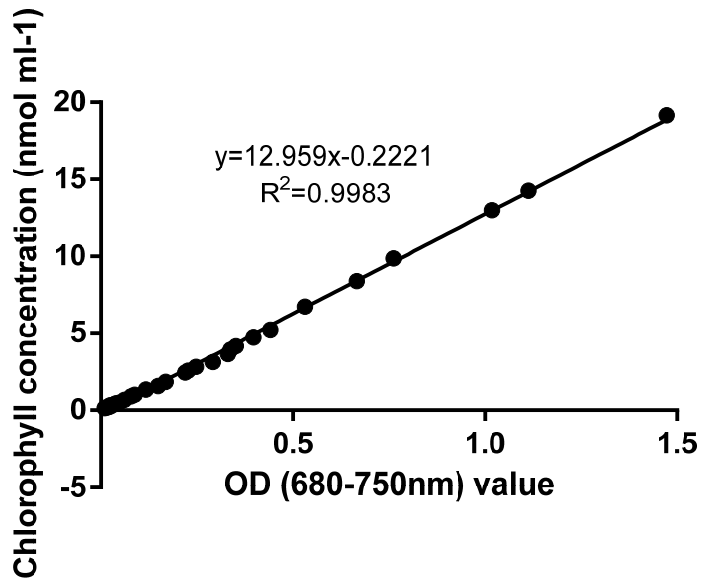

159

160 **Figure S13: Correlation between the absorbance at 680 nm and 750 nm, and amounts of**  
161 **chlorophyll measured following methanol extraction.** Twenty-nine samples were measured at  
162 an absorbance of 750 nm and 680 nm, followed by extraction with methanol to measure  
163 chlorophyll concentration. The amount of chlorophyll was correlated with absorbance ( $A_{680\text{nm}}$ -  
164  $A_{750\text{nm}}$ ). The regression line is shown. The slope of the regression line ( $R^2=0.9983$ ), equivalent to  
165 12.959, was calculated.

166

167

168

169

170

171

172

173

174 **Table S1. Conservation of hydrocarbon biosynthetic pathway proteins and CurT in**  
175 **sequenced cyanobacteria strains.** The *Synechocystis* FAD/FAR/CurT and *Synechococcus* Ols  
176 amino acid sequences were subjected to BLAST analysis against sequenced cyanobacterial  
177 genomes in the NCBI database. The positive values of these BLAST results are listed. Due to  
178 similarities between Ols and other polyketide synthase proteins only matches greater than 50%  
179 identity over the length of the query sequence are shown.

180

| Strain                                         | Fad          | Far          | Ols            | CurT        |
|------------------------------------------------|--------------|--------------|----------------|-------------|
| <i>Acaryochloris marina</i> MBIC11017          | 292/337(86%) | 191/230(83%) |                | 55/92(60%)  |
| <i>Anabaena cylindrica</i> PCC7122             | 301/338(89%) | 197/223(88%) |                | 82/124(66%) |
| <i>Anabaena</i> sp. 90                         | 297/338(87%) | 196/223(87%) |                | 90/137(66%) |
| <i>Anabaena</i> sp. PCC7108                    | 302/338(89%) | 197/223(88%) |                | 91/138(66%) |
| <i>Anabaena variabilis</i> ATCC29413           | 305/338(90%) | 204/230(88%) |                | 90/138(65%) |
| <i>Arthrospira maxima</i> CS-328               | 295/338(87%) | 206/231(89%) |                | 90/134(67%) |
| <i>Arthrospira platensis</i> NIES-39           | 295/338(87%) | 206/231(89%) |                | 87/134(65%) |
| <i>Calothrix</i> sp. PCC6303                   | 298/338(88%) | 202/228(88%) |                | 81/123(66%) |
| <i>Calothrix</i> sp. PCC7103                   | 295/338(87%) | 198/219(90%) |                | 87/135(64%) |
| <i>Calothrix</i> sp. PCC7507                   | 299/338(88%) | 202/228(88%) |                | 82/123(67%) |
| <i>Candidatus atelocyanobacterium thalassa</i> | 296/338(87%) | 198/228(86%) |                | 81/105(77%) |
| <i>Chamaesiphon minutus</i> PCC6605            | 299/340(87%) | 193/230(83%) |                | 69/100(69%) |
| <i>Chlorogloeopsis fritschii</i>               | 297/338(87%) | 202/231(87%) |                | 79/123(64%) |
| <i>Chroococcales</i> CENA595                   | 300/338(88%) | 199/230(86%) |                | 81/119(68%) |
| <i>Chroococciopsis thermalis</i> PCC7203       | 301/339(88%) | 200/228(87%) |                | 69/95(73%)  |
| <i>Coleofasciculus chthonoplastes</i> PCC7420  | 298/338(88%) | 199/230(86%) |                | 83/111(75%) |
| <i>Crinalium epipsammum</i> PCC9333            | 299/339(88%) | 190/225(84%) |                | 89/126(71%) |
| <i>Crocospaera watsonii</i> WH8501             | 291/339(85%) | 206/231(89%) |                | 98/134(73%) |
| <i>Cyanobacterium aponinum</i> PCC10605        | 290/340(85%) | 193/225(85%) |                | 88/133(66%) |
| <i>Cyanobium gracile</i> PCC6307               | 256/337(75%) | 181/220(82%) |                | 36/65(55%)  |
| <i>Cyanobium</i> sp. PCC7001                   | 261/334(78%) | 182/220(82%) |                |             |
| <i>Cyanothece</i> sp. ATCC51142                | 294/339(86%) | 206/228(90%) |                | 99/134(74%) |
| <i>Cyanothece</i> sp. CCY0110                  | 301/338(89%) | 207/230(90%) |                | 94/134(70%) |
| <i>Cyanothece</i> sp. PCC7424                  |              |              | 1871/2798(66%) | 98/136(72%) |
| <i>Cyanothece</i> sp. PCC7425                  | 290/338(85%) | 196/230(85%) |                | 74/121(61%) |
| <i>Cyanothece</i> sp. PCC7822                  |              |              | 1873/2800(66%) | 88/113(78%) |
| <i>Cyanothece</i> sp. PCC8801                  | 306/339(90%) | 205/230(89%) |                | 95/131(73%) |
| <i>Cylindrospermopsis raciborskii</i> CS-505   | 301/338(89%) | 191/222(86%) |                | 88/136(65%) |
| <i>Cylindrospermum stagnale</i> PCC7417        | 299/338(88%) | 199/231(86%) |                | 92/137(67%) |



|                                           |              |              |                |             |
|-------------------------------------------|--------------|--------------|----------------|-------------|
| <i>Dactylococcopsis salina</i> PCC8305    | 282/338(83%) | 199/231(86%) |                | 77/105(73%) |
| <i>Dolichospermum circinale</i>           | 298/338(88%) | 197/221(89%) |                | 78/115(68%) |
| <i>Fischerella</i> sp. PCC9339            | 296/338(87%) | 200/228(87%) |                | 68/117(58%) |
| <i>Fischerella</i> sp. PCC9431            | 296/338(87%) | 200/228(87%) |                | 69/117(59%) |
| <i>Fischerella</i> sp. PCC9605            | 299/338(88%) | 203/228(89%) |                | 81/123(66%) |
| <i>Geitlerinema</i> sp. PCC7407           | 292/339(86%) | 204/231(88%) |                | 75/104(72%) |
| <i>Geminocystis herdmannii</i>            |              |              | 1791/2846(62%) | 76/105(72%) |
| <i>Geminocystis</i> sp. NIES-3708         | 292/340(85%) | 199/230(86%) |                | 92/137(67%) |
| <i>Geminocystis</i> sp. NIES-3709         |              |              | 1785/2865(62%) | 87/136(64%) |
| <i>Gloeobacter kilaueensis</i> JS1        | 264/340(78%) | 179/221(81%) |                |             |
| <i>Gloeobacter violaceus</i> PCC7421      | 266/338(79%) | 183/221(82%) |                |             |
| <i>Gloeocapsa</i> sp. PCC7428             | 299/338(88%) | 193/226(85%) |                | 88/130(68%) |
| <i>Halothece</i> sp. PCC7418              | 287/338(84%) | 202/228(88%) |                | 66/95(69%)  |
| <i>Hassallia byssoidea</i> VB512170       | 297/338(87%) | 200/228(87%) |                | 84/124(68%) |
| <i>Leptolyngbya boryana</i>               | 295/338(87%) | 200/230(86%) |                | 76/111(68%) |
| <i>Leptolyngbya</i> sp. JSC-1             | 294/338(86%) | 201/230(87%) |                | 89/136(65%) |
| <i>Leptolyngbya</i> sp. PCC7376           |              |              | 2161/2726(79%) | 87/134(65%) |
| <i>Limnorpahis robusta</i>                | 297/338(87%) | 204/231(88%) |                | 71/94(76%)  |
| <i>Lyngbya aestuarii</i>                  | 298/338(88%) | 201/230(87%) |                | 91/153(59%) |
| <i>Lyngbya</i> sp. PCC8106                | 296/338(87%) | 196/229(85%) |                | 88/143(62%) |
| <i>Mastigocoleus repens</i>               | 294/338(86%) | 201/230(87%) |                | 82/123(67%) |
| <i>Mastigocoleus testarum</i>             | 296/338(87%) | 202/228(88%) |                |             |
| <i>Microchaete</i> sp. PCC7126            | 298/338(88%) | 206/230(89%) |                | 86/138(62%) |
| <i>Microcoleus</i> sp. PCC7113            | 301/340(88%) | 201/230(87%) |                | 95/142(67%) |
| <i>Microcoleus vaginatus</i> FGP-2        | 297/338(87%) | 194/230(84%) |                | 73/101(72%) |
| <i>Microcystis aeruginosa</i> NIES-843    | 299/338(88%) | 207/231(89%) |                | 77/110(70%) |
| <i>Moorea producens</i> 3L                |              |              | 1558/2851(55%) | 91/137(66%) |
| <i>Myxosarcina</i> sp. G11                |              |              | 1820/2823(64%) | 73/111(66%) |
| <i>Nodularia spumigena</i> CCY9414        | 302/338(89%) | 199/230(86%) |                | 91/137(66%) |
| <i>Nostoc azollae</i> ' 0708              | 299/338(88%) | 197/223(88%) |                | 91/140(65%) |
| <i>Nostoc punctiforme</i> PCC73102        | 298/338(88%) | 196/222(88%) |                | 91/141(65%) |
| <i>Nostoc</i> sp. KNUA003                 | 307/338(90%) | 197/230(85%) |                |             |
| <i>Nostoc</i> sp. PCC6720                 | 307/338(90%) | 197/230(85%) |                |             |
| <i>Nostoc</i> sp. PCC7107                 | 305/338(90%) | 195/230(84%) |                | 91/137(66%) |
| <i>Nostoc</i> sp. PCC7120                 | 305/338(90%) | 204/230(88%) |                | 90/138(65%) |
| <i>Nostoc</i> sp. PCC7524                 | 303/338(89%) | 202/230(87%) |                | 88/137(64%) |
| <i>Oscillatoria acuminata</i> PCC6304     | 294/338(86%) | 202/231(87%) |                | 77/110(70%) |
| <i>Oscillatoria cyanobacterium</i> JSC-12 | 297/339(87%) | 201/230(87%) |                | 85/123(69%) |
| <i>Oscillatoria nigro-viridis</i> PCC7112 | 297/338(87%) | 194/230(84%) |                | 73/101(72%) |
| <i>Oscillatoria</i> sp. PCC6506           | 301/338(89%) | 196/230(85%) |                | 87/134(65%) |
| <i>Oscillatoria</i> sp. PCC10802          | 295/341(86%) | 202/231(87%) |                | 89/134(66%) |
| <i>Pleurocapsa</i> sp. PCC7319            |              |              | 1862/2843(65%) | 83/135(61%) |

|                                              |              |              |                |             |
|----------------------------------------------|--------------|--------------|----------------|-------------|
| <i>Pleurocapsa</i> sp. PCC7327               |              |              | 1890/2861(66%) | 91/110(83%) |
| <i>Prochlorococcus marinus</i> str. AS9601   | 262/337(77%) | 173/214(80%) |                | 37/68(54%)  |
| <i>Prochlorococcus marinus</i> str. CCMP1375 | 263/337(78%) | 169/218(77%) |                | 60/114(53%) |
| <i>Prochlorococcus marinus</i> str. CCMP1986 | 261/337(77%) | 173/214(80%) |                | 32/63(51%)  |
| <i>Prochlorococcus</i> EQPAC1                | 261/337(77%) | 173/214(81%) |                | 32/63(51%)  |
| <i>Prochlorococcus</i> GP2                   | 262/337(78%) | 173/214(81%) |                | 53/114(46%) |
| <i>Prochlorococcus</i> LG                    | 263/337(78%) | 169/218(78%) |                | 60/114(53%) |
| <i>Prochlorococcus marinus</i> str. MIT9107  | 258/337(77%) | 171/214(80%) |                | 53/114(46%) |
| <i>Prochlorococcus marinus</i> str. MIT9116  | 258/337(77%) | 171/214(80%) |                | 53/114(46%) |
| <i>Prochlorococcus marinus</i> str. MIT9123  | 258/337(77%) | 171/214(80%) |                | 53/114(46%) |
| <i>Prochlorococcus marinus</i> str. MIT9201  | 261/337(77%) | 172/214(80%) |                | 37/68(54%)  |
| <i>Prochlorococcus marinus</i> str. MIT9202  | 262/337(77%) | 148/186(80%) |                | 37/68(54%)  |
| <i>Prochlorococcus marinus</i> str. MIT9211  | 257/334(76%) | 171/219(78%) |                | 49/93(53%)  |
| <i>Prochlorococcus marinus</i> str. MIT9215  | 262/337(77%) | 171/214(79%) |                | 37/68(54%)  |
| <i>Prochlorococcus marinus</i> str. MIT9301  | 262/337(77%) | 173/214(80%) |                | 37/68(54%)  |
| <i>Prochlorococcus marinus</i> str. MIT9302  | 262/337(78%) | 173/214(81%) |                | 38/79(48%)  |
| <i>Prochlorococcus marinus</i> str. MIT9303  | 237/303(78%) | 183/236(77%) |                | 35/64(55%)  |
| <i>Prochlorococcus marinus</i> str. MIT9311  | 260/337(77%) | 174/214(81%) |                | 37/67(55%)  |
| <i>Prochlorococcus marinus</i> str. MIT9312  | 260/337(77%) | 174/214(81%) |                | 37/67(55%)  |
| <i>Prochlorococcus marinus</i> str. MIT9313  | 265/337(78%) | 178/218(81%) |                | 37/67(55%)  |
| <i>Prochlorococcus marinus</i> str. MIT9314  | 261/337(77%) | 172/214(80%) |                | 37/68(54%)  |
| <i>Prochlorococcus marinus</i> str. MIT9322  | 262/337(78%) | 173/214(81%) |                | 37/68(54%)  |
| <i>Prochlorococcus marinus</i> str. MIT9401  | 262/337(78%) | 173/214(81%) |                | 37/68(54%)  |
| <i>Prochlorococcus marinus</i> str. MIT9515  | 263/337(78%) | 169/214(79%) |                | 32/59(54%)  |
| <i>Prochlorococcus marinus</i> str. MIT0601  | 260/337(77%) | 172/214(80%) |                | 60/118(51%) |
| <i>Prochlorococcus marinus</i> str. MIT0604  | 262/337(78%) | 172/214(80%) |                | 37/68(54%)  |
| <i>Prochlorococcus marinus</i> str. MIT0701  | 267/337(80%) | 177/220(80%) |                | 37/67(55%)  |
| <i>Prochlorococcus marinus</i> str. MIT0702  | 268/337(80%) | 177/220(80%) |                | 37/67(55%)  |
| <i>Prochlorococcus marinus</i> str. MIT0703  | 268/337(80%) | 177/220(80%) |                | 37/67(55%)  |
| <i>Prochlorococcus marinus</i> str. MIT0801  | 259/334(78%) | 174/222(78%) |                | 38/68(56%)  |
| <i>Prochlorococcus marinus</i> str. NATL1A   | 258/334(77%) | 174/222(78%) |                | 38/68(56%)  |
| <i>Prochlorococcus marinus</i> str. NATL2A   | 257/334(76%) | 174/222(78%) |                | 38/68(56%)  |
| <i>Prochlorococcus marinus</i> str. PAC1     | 257/334(77%) | 174/222(78%) |                | 38/68(56%)  |
| <i>Prochlorococcus marinus</i> str. SB       | 260/337(77%) | 173/214(81%) |                | 37/68(54%)  |
| <i>Prochlorococcus marinus</i> str. SS2      | 263/337(78%) | 169/218(78%) |                | 60/114(53%) |
| <i>Prochlorococcus marinus</i> str. SS35     | 263/337(78%) | 169/218(78%) |                | 60/114(53%) |
| <i>Prochlorococcus marinus</i> str. SS51     | 263/337(78%) | 169/218(78%) |                | 60/114(53%) |
| <i>Prochlorococcus marinus</i> str. SS52     | 263/337(78%) | 169/218(78%) |                | 60/114(53%) |
| <i>Prochloron didemni</i>                    |              |              | 1831/2988(61%) |             |
| <i>Prochlorothrix hollandica</i>             | 293/338(86%) | 193/229(84%) |                | 66/100(66%) |
| <i>Pseudanabaena</i> sp. PCC 7367            | 285/339(84%) | 201/226(88%) |                | 37/53(70%)  |
| <i>Raphidiopsis brookii</i> D9               | 299/338(88%) | 194/221(87%) |                | 89/136(65%) |
| <i>Rivularia</i> sp. PCC 7116                | 294/338(86%) | 194/228(85%) |                | 73/110(66%) |

|                                           |              |              |                |              |
|-------------------------------------------|--------------|--------------|----------------|--------------|
| <i>Scytonema hofmanni</i> UTEX B 1581     | 299/338(88%) | 200/228(87%) |                | 83/123(67%)  |
| <i>Scytonema millei</i>                   | 302/339(89%) | 200/231(86%) |                | 70/95(74%)   |
| <i>Scytonema tolypothrichoides</i>        | 299/338(88%) | 200/228(87%) |                | 82/128(64%)  |
| <i>Stanieria cyanosphaera</i> PCC7437     |              |              | 1899/2788(68%) | 86/126(68%)  |
| <i>Synechococcus elongatus</i>            | 279/337(82%) | 195/231(84%) |                | 78/118(66%)  |
| <i>Synechococcus</i> sp. BL107            | 259/337(76%) | 172/210(81%) |                | 60/129(47%)  |
| <i>Synechococcus</i> sp. CC9311           | 265/339(78%) | 181/219(82%) |                | 43/75(57%)   |
| <i>Synechococcus</i> sp. CC9605           | 266/337(78%) | 171/210(81%) |                | 57/128(45%)  |
| <i>Synechococcus</i> sp. CC9902           | 259/337(76%) | 172/210(81%) |                | 60/129(47%)  |
| <i>Synechococcus</i> sp. NKBG15041c       |              |              | 2327/2724(85%) | 93/135(69%)  |
| <i>Synechococcus</i> sp. JA-2-3B'a(2-13)  | 268/338(79%) | 179/221(80%) |                | 33/64(52%)   |
| <i>Synechococcus</i> sp. JA-3-3Ab         | 268/338(79%) | 180/221(81%) |                |              |
| <i>Synechococcus</i> sp. PCC6312          | 294/338(86%) | 188/221(85%) |                | 79/132(60%)  |
| <i>Synechococcus</i> sp. PCC7002          |              |              | 2720/2720      | 90/133(68%)  |
| <i>Synechococcus</i> sp. PCC7335          | 285/339(84%) | 196/231(84%) |                | 76/115(66%)  |
| <i>Synechococcus</i> sp. PCC7502          | 283/339(83%) | 188/222(84%) |                | 80/139(58%)  |
| <i>Synechococcus</i> sp. RCC307           | 265/337(78%) | 182/220(82%) |                | 59/130(45%)  |
| <i>Synechococcus</i> sp. RS9916           | 263/337(78%) | 173/210(82%) |                | 38/69(55%)   |
| <i>Synechococcus</i> sp. RS9917           | 262/337(77%) | 176/210(83%) |                | 53/116(46%)  |
| <i>Synechococcus</i> sp. WH5701           | 264/334(79%) | 182/220(82%) |                | 42/67(63%)   |
| <i>Synechococcus</i> sp. WH7803           | 264/337(78%) | 180/219(82%) |                | 42/75(56%)   |
| <i>Synechococcus</i> sp. WH7805           | 265/337(78%) | 175/210(83%) |                | 51/103(50%)  |
| <i>Synechococcus</i> sp. WH8102           | 263/337(78%) | 174/210(82%) |                | 60/128(47%)  |
| <i>Synechococcus</i> sp. WH8109           | 265/337(78%) | 174/210(82%) |                | 44/94(47%)   |
| <i>Synechocystis</i> sp. PCC6714          | 338/340(99%) | 227/231(98%) |                | 131/134(98%) |
| <i>Synechocystis</i> sp. PCC6803          | 340/340      | 231/231      |                | 149/149      |
| <i>Synechocystis</i> sp. PCC7509          | 299/340(87%) | 199/230(86%) |                | 85/134(63%)  |
| <i>Thermosynechococcus elongatus</i> BP-1 | 290/338(85%) | 186/221(84%) |                | 69/124(56%)  |
| <i>Tolypothrix campylonemoides</i>        | 299/338(88%) | 203/231(87%) |                | 82/124(66%)  |
| <i>Tolypothrix</i> sp. PCC7601            | 302/338(89%) | 203/230(88%) |                | 89/137(68%)  |
| <i>Trichodesmium erythraeum</i> IMS101    | 297/338(87%) | 192/220(87%) |                | 66/93(71%)   |
| <i>Trichormus azollae</i>                 | 299/338(88%) | 197/223(88%) |                | 73/105(70%)  |
| <i>Xenococcus</i> sp. PCC7305             |              |              | 1857/2848(65%) | 87/137(64%)  |

181

182

183

184

185

186 **Table S2: Cell size as determined via fluorescence microscopy.** Values represent the cell  
 187 diameter of *Synechocystis* cells and width/length of *Synechococcus* cells in  $\mu\text{m}$ . The cellular  
 188 volume is measured in  $\mu\text{m}^3$ . Standard deviation (S.D.) is indicated. Asterisks indicate significant  
 189 differences between samples (Student's t-test;  $P < 0.0001$ ).

190

| Strain               | Cells counted | Cell size (Mean) | cell size (S.D.) | Cell volume ( $\pm$ S.D.) | Minimum cell size | Median cell size | Maximum cell size |
|----------------------|---------------|------------------|------------------|---------------------------|-------------------|------------------|-------------------|
| <i>Synechocystis</i> |               |                  |                  |                           |                   |                  |                   |
| Wild-type            | 171           | 2.06             | 0.13             | 4.63 $\pm$ 0.83           | 1.60              | 2.08             | 2.38              |
| $\Delta$ FAR         | 121           | 2.72*            | 0.34             | 11.02 $\pm$ 4.23*         | 1.72              | 2.72*            | 3.85              |
| $\Delta$ FAR:comp    | 186           | 2.09             | 0.15             | 4.83 $\pm$ 0.99           | 1.60              | 2.08             | 2.40              |
| <i>Synechococcus</i> |               |                  |                  |                           |                   |                  |                   |
| Wild-type            | 102           | 1.61/2.30        | 0.13/0.50        | 3.08 $\pm$ 0.72           | 1.36/1.60         | 1.58/2.21        | 2.13/4.36         |
| $\Delta$ ols         | 128           | 1.76*/2.41       | 0.27/0.84        | 3.89 $\pm$ 1.49*          | 1.36/1.40         | 1.7*/2.30        | 3.57/7.49         |

191

192

193

194

195

196 **Table S3: Cell size as determined via particle counting measurements.** Values represent the  
 197 cell width/diameter of the cells in  $\mu\text{m}$ . The cellular volume is measured in  $\mu\text{m}^3$ . Standard  
 198 deviation (S.D.) is indicated. Asterisks indicate significant differences between samples ( $P <$   
 199  $0.0001$ ).

200

201

| Strain               | Cells counted | Cell size (Mean) | Cell size (S.D.) | Cell volume | Minimum cell size | Median cell size | Maximum cell size |
|----------------------|---------------|------------------|------------------|-------------|-------------------|------------------|-------------------|
| <i>Synechocystis</i> |               |                  |                  |             |                   |                  |                   |
| Wild-type            | 1069396       | 2.06             | 0.31             | 4.58        | 1.60              | 2.08             | 2.38              |
| $\Delta$ FAR         | 370156        | 2.80*            | 0.41             | 11.49*      | 1.72              | 2.72*            | 3.85              |
| $\Delta$ FAR:comp    | 917114        | 2.00             | 0.23             | 4.19        | 1.60              | 2.08             | 2.40              |

202

203

204

205 **Table S4: Cell counts of single and actively dividing *Synechocystis* cells.** Asterisks indicate  
 206 significant differences between samples ( $P < 0.05$ ).

207

| <b>Strain</b>     | <b>Single cells</b> | <b>Dividing cells</b> | <b>Total cells</b> | <b>% Single cells</b> | <b>% Dividing cells</b> |
|-------------------|---------------------|-----------------------|--------------------|-----------------------|-------------------------|
| Wild-type         | 257                 | 172                   | 429                | 59.9                  | 40.1                    |
| $\Delta$ FAR      | 169                 | 152                   | 321                | 52.6*                 | 47.4*                   |
| $\Delta$ FAR:comp | 178                 | 117                   | 295                | 60.3                  | 39.7                    |

208

209

210 **Table S5: Carotenoid/chlorophyll ratios in cyanobacterial strains.** Results are from three  
 211 biological replicates.

212

| <b>Strain</b>        | <b>Mean</b> | <b>S.D.</b> |
|----------------------|-------------|-------------|
| <i>Synechocystis</i> |             |             |
| Wild-type            | 0.31369     | 0.10439     |
| $\Delta$ FAR         | 0.39693     | 0.10933     |
| $\Delta$ FAR:comp    | 0.42608     | 0.10330     |
| <i>Synechococcus</i> |             |             |
| Wild-type            | 0.91792     | 0.01904     |
| $\Delta$ Ols         | 1.28426     | 0.15799     |

213

214

215

216

217

218

219

220

221

222 **Table S6: Lipid composition of cyanobacterial membranes.** The experimental lipid  
 223 composition according to Sheng *et al* is shown in mM, and has been adjusted to account for  
 224 lipids rather than fatty acids. The simplified composition used in a 2,400 lipid bilayer in the *in*  
 225 *silico* models is given in brackets. ND = not detected.

226  
 227

|                                | <b>PG</b>          | <b>MGDG</b>         | <b>SQDG</b>        | <b>DGDG</b>        |
|--------------------------------|--------------------|---------------------|--------------------|--------------------|
| 2x16:0                         | 0.041 (96)         | 0.329 (840)         | 0.239 (600)        | 0.082 (192)        |
| 16:0-16:1 <sup>Δ9</sup>        | ND                 | 0.044 (96)          | 0.040 (96)         | 0.006 (24)         |
| 16:0-18:1 <sup>Δ9</sup>        | 0.014 (48)         | 0.018 (48)          | 0.032 (96)         | 0.012 (48)         |
| 16:0-18:2 <sup>Δ9,12</sup>     | 0.006 (24)         | 0.030 (72)          | 0.017 (48)         | 0.010 (24)         |
| 16:0-α18:3 <sup>Δ9,12,15</sup> | ND                 | 0.024 (48)          | ND                 | ND                 |
| <b>Total</b>                   | <b>0.061 (168)</b> | <b>0.445 (1104)</b> | <b>0.328 (840)</b> | <b>0.110 (288)</b> |

228  
 229  
 230  
 231

232 **Table S7: Sequence of primers used in this study.** Restriction endonuclease sites introduced  
 233 into the primer are underlined.

234

| <b>Primer</b>  | <b>Sequence</b>                          |
|----------------|------------------------------------------|
| SII0209for     | GTAC <u>G</u> CATGCACCTTGTTCCACCAGCTCCAC |
| SII0209rev     | GTACTCTAGACAAAATGGAAAACCGCCATA           |
| olsfor         | GATCGAATTCAGCAAACCGTTTTGTGACC            |
| olsrev         | GTACGTCGACTGCAAGGTGGCGAACTGTAT           |
| phaABleftfor   | GTACTCTAGAGGGACCATCCTGACTACACG           |
| phaABleftrev   | GATCGGATCCGTTTCGTTTAGCGGCAACAAT          |
| phaABrightfor  | GATCGAGCTCTTTTACTTTCCCCCGTAGCC           |
| phaABrightrev  | GACTGAATTCGCATTGTCTGGTCCATGTTG           |
| SII0209compfor | GATCGGATCCTTTGACCAGCAGCATTGAG            |
| SII0209comprev | GATCGAGCTCTTTTCATGAGCCCACAAATCC          |
| Phafor         | ATTGTTGCCGCTAAACGAAC                     |
| Pharev         | TACTGGCTACGGGGGAAAGT                     |

235  
 236  
 237  
 238

239

240

241
